# Supplementary material
Source: Springer Nature journal article supplement (https://www.springermedizin.de/resource/supplementary/12889_2012_4082_MOESM1_ESM.pdf/9491272)
Supplement: MOESM1 [file 9491272]

**Table1: Socio demographic Characteristic of the Study participants (n=384), GUH, Northwest Ethiopia, 2011.**

| Variables                               |                       | Frequency | Percent (%) |
|-----------------------------------------|-----------------------|-----------|-------------|
| Sex                                     | Male                  | 142       | 37.0        |
|                                         | Female                | 242       | 63.0        |
| Age                                     | 18-40                 | 36        | 9.4         |
|                                         | 41-60                 | 210       | 54.7        |
|                                         | >=60                  | 138       | 35.9        |
| Ethnicity                               | Amhara                | 361       | 94.0        |
|                                         | Tigrie                | 18        | 4.7         |
|                                         | Others                | 5         | 1.3         |
| Residence                               | Rural                 | 90        | 23.4        |
|                                         | Urban                 | 294       | 76.6        |
| Marital status                          | Single                | 17        | 4.4         |
|                                         | Married               | 233       | 60.7        |
|                                         | Divorced              | 41        | 10.7        |
|                                         | Widowed               | 93        | 24.2        |
| Religion                                | Orthodox              | 343       | 89.3        |
|                                         | Muslim                | 36        | 9.4         |
|                                         | Others                | 5         | 1.3         |
| Employment status                       | Government            | 74        | 19.3        |
|                                         | Merchant              | 93        | 24.2        |
|                                         | Student               | 8         | 2.1         |
|                                         | Housewife             | 87        | 22.7        |
|                                         | Farmer                | 43        | 11.2        |
|                                         | Retired               | 79        | 20.6        |
| Educational status                      | Cannot read and write | 196       | 51          |
|                                         | Grade1-6              | 60        | 15.6        |
|                                         | Grade 7-12            | 83        | 21.6        |
|                                         | Diploma and above     | 45        | 11.7        |
| Monthly income                          | <500 ETB              | 248       | 64.6        |
|                                         | 500-1000ETB           | 65        | 16.9        |
|                                         | >=1000ETB             | 71        | 18.5        |
| Distance from the hospital(single trip) | <0.5 hours            | 151       | 39.3        |
|                                         | ≥ 0.5 hours           | 233       | 60.7        |
